# Supplementary material for: Hollow metal composite phosphides derived from MOFs as highly efficient and durable bifunctional electrocatalysts for water splitting
Source: Royal Society of Chemistry journal article supplement (doi:10.1039/d2nj05475b), 2022-12-12
Supplement: d2nj05475b1.pdf [file d2nj05475b1.pdf]

## Supporting Information

# Hollow Metal Composite Phosphides Derived from MOFs as Highly Efficient and Durable Bifunctional Electrocatalyst for Water Splitting

*Rui Dang*\*<sup>1</sup>, *Mengmeng Xie*<sup>1,2</sup>, *Meixin Li*<sup>1,2</sup>, *Xiufeng Xu*<sup>1,2</sup>

<sup>1</sup> Northwest Institute For Nonferrous Metal Research, 96 Weiyang Road, Weiyang district, 710016, P.R. China.

<sup>2</sup> The Faculty of Printing, Packaging Engineering and Digital Media Technology, Xi'an University of Technology, Xi'an 710054, P.R. China.

### **Corresponding Author**

Northwest Institute For Nonferrous Metal Research, 96 Weiyang Road, Weiyang district, 710016, P.R. China.

\*Email: dr0501@163.com (Rui Dang)

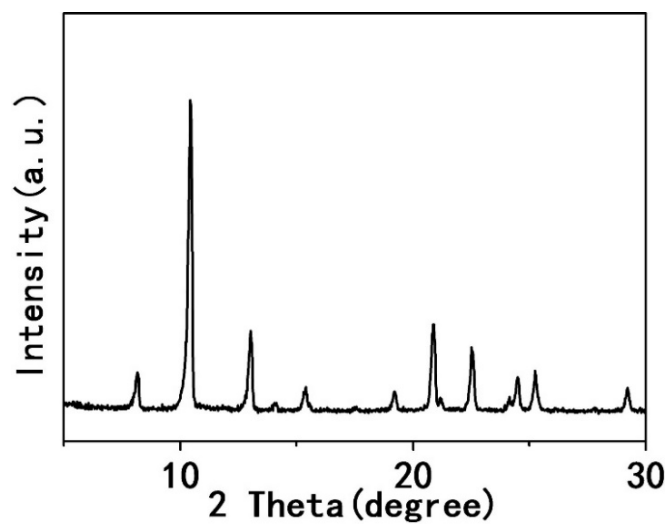

Figure S1. XRD patterns of Fe-MIL-88A

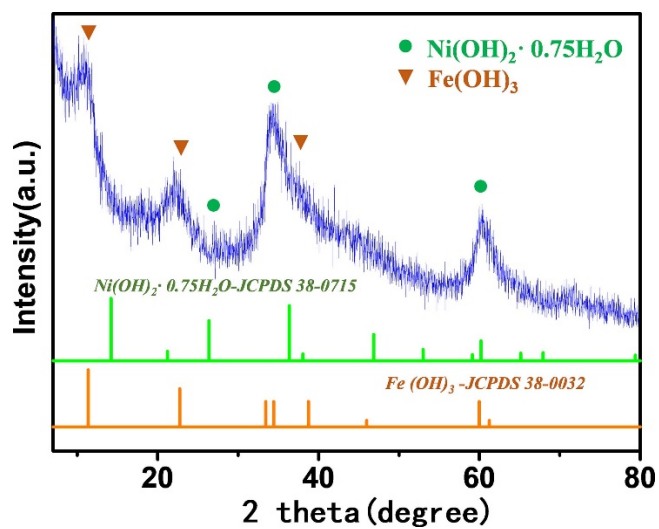

Figure S2. XRD patterns of Fe(OH)<sub>3</sub>@Ni(OH)<sub>2</sub>·0.75H<sub>2</sub>O

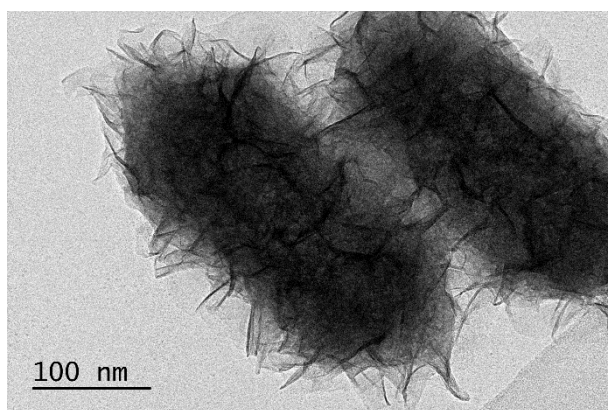

Figure S3. TEM image of Fe(OH)<sub>3</sub>@Ni(OH)<sub>2</sub>·0.75H<sub>2</sub>O

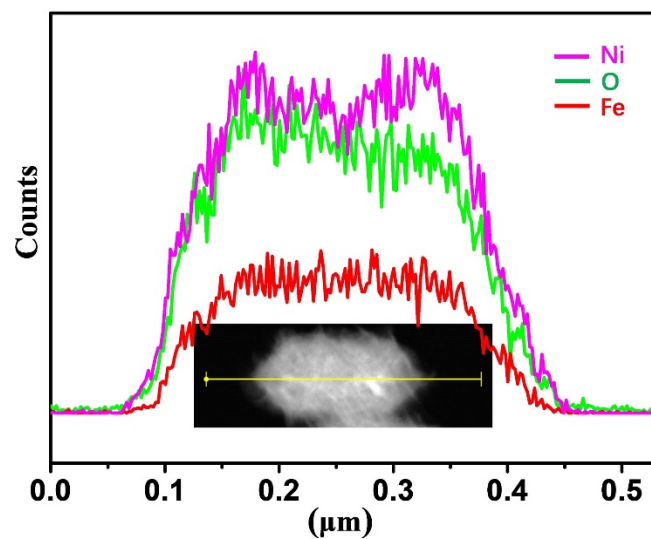

**Figure S4.** TEM -EDS elemental line-scan of  $\text{Fe}(\text{OH})_3@ \text{Ni}(\text{OH})_2 \cdot 0.75\text{H}_2\text{O}$

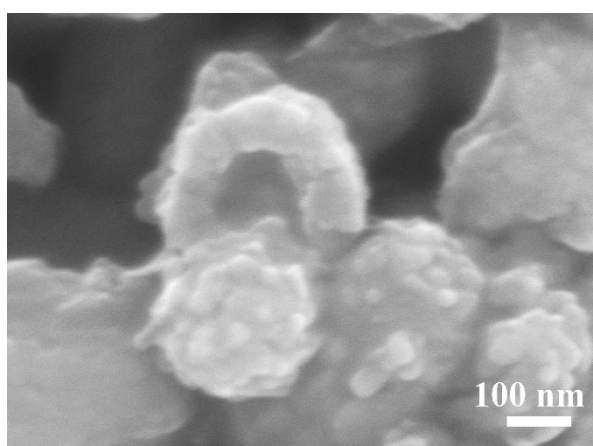

**Figure S5.** SEM image of a broken  $\text{Fe}_2\text{P} @ \text{Ni}_2\text{P}/\text{Ni}_5\text{P}_4$  nanospindle

**Table S1.** Comparison of HER and OER catalytic performance of hollow Fe<sub>2</sub>P@Ni<sub>5</sub>P<sub>4</sub>/Ni<sub>2</sub>P nanospindles and other reported metal phosphides electrocatalysts in acidic and basic conditions.

| <b>Materials</b>                                                    | <b>Electrolyte</b>                      | <b>Catalyst loading</b>   | <b>Overpotential (<math>\eta_{10}</math>, mV)</b> | <b>Long-time stability</b> | <b>Ref</b> |
|---------------------------------------------------------------------|-----------------------------------------|---------------------------|---------------------------------------------------|----------------------------|------------|
| Ni <sub>2</sub> P@NC                                                | OER 1M KOH                              | 1.0 mg cm <sup>-2</sup>   | 320                                               | 10h ( $\eta_{10}$ )        | 43         |
| Ni <sub>12</sub> P <sub>5</sub> @NC                                 | OER 1M KOH                              | 1.0 mg cm <sup>-2</sup>   | 330                                               | -                          | 43         |
| CoP@NC                                                              | OER 1M KOH                              | 1.0 mg cm <sup>-2</sup>   | 348                                               | -                          | 43         |
| Co <sub>2</sub> P@NC                                                | OER 1M KOH                              | 1.0 mg cm <sup>-2</sup>   | 383                                               | -                          | 43         |
| FeP@NC                                                              | OER 1M KOH                              | 1.0 mg cm <sup>-2</sup>   | 409                                               | -                          | 43         |
| Fe <sub>2</sub> P@NC                                                | OER 1M KOH                              | 1.0 mg cm <sup>-2</sup>   | 415                                               | -                          | 43         |
| NiFeP                                                               | OER 1M KOH                              | 7.0 mg cm <sup>-2</sup>   | 231                                               | 20h ( $\eta_{100}$ )       | 47         |
| Fe <sub>2</sub> P/Ni <sub>2</sub> P                                 | OER 1M KOH                              | 5.0 mg cm <sup>-2</sup>   | 185                                               | 100h ( $\eta_{20}$ )       | 48         |
| Fe <sub>2</sub> P–Ni <sub>2</sub> P                                 | OER 1M KOH                              | 0.085 mg cm <sup>-2</sup> | 317                                               | 20h ( $\eta_{10}$ )        | 49         |
| Co-doped Ni <sub>5</sub> P <sub>4</sub>                             | HER 0.5M H <sub>2</sub> SO <sub>4</sub> | 0.05 mg cm <sup>-2</sup>  | 310                                               | 18h ( $\eta_{10}$ )        | 50         |
| Ni <sub>2</sub> P@C                                                 | HER 1M KOH                              | 0.64 mg cm <sup>-2</sup>  | 148                                               | 24h ( $\eta_{10}$ )        | 51         |
| Ni <sub>2</sub> P@C                                                 | OER 1M KOH                              | 0.64 mg cm <sup>-2</sup>  | 328                                               | 24h ( $\eta_{20}$ )        | 51         |
| Ni <sub>5</sub> P <sub>4</sub> @FeP                                 | OER 1M KOH                              | -                         | 205                                               | 50h ( $\eta_{50}$ )        | 52         |
| Fe <sub>2</sub> P@Ni <sub>5</sub> P <sub>4</sub> /Ni <sub>2</sub> P | HER 1M KOH                              | 1.0 mg cm <sup>-2</sup>   | 376 ( $\eta_{20}$ )                               | 110h ( $\eta_{50}$ )       | This work  |
|                                                                     | OER 1M KOH                              | 1.0 mg cm <sup>-2</sup>   | 230                                               | 49h ( $\eta_{20}$ )        |            |
